# Supplementary material for: New Red-Shifted 4-Styrylcoumarin Derivatives as Potential Fluorescent Labels for Biomolecules
Source: MDPI journal article supplement (doi:10.3390/molecules27051461), 2022-02-22
Supplement: s1 [file s1]

# Supporting Information (SI)

## New Red-Shifted 4-Styrylcoumarin Derivatives as Potential Fluorescent Labels for Biomolecules

Raquel Eustáquio<sup>1</sup>, João P. Prates Ramalho<sup>2,3</sup>, Ana T. Caldeira<sup>1,2</sup>, António Pereira<sup>1,2,\*</sup>

<sup>1</sup> HERCULES Laboratory and City University of Macau Chair in Sustainable Heritage, University of Évora, Largo Marquês de Marialva 8, 7000-809 Évora, Portugal.

<sup>2</sup> Chemistry Department, School of Sciences and Technology, University of Évora, Rua Romão Ramalho 59, 7000-671 Évora, Portugal.

<sup>3</sup> LAQV-REQUIMTE, University of Évora, Rua Romão Ramalho 59, 7000-671 Évora, Portugal.

\* Correspondence: amlp@uevora.pt

### Contents:

|   |                                    |     |
|---|------------------------------------|-----|
| 1 | NMR spectra.....                   | S2  |
| 2 | Mass spectra.....                  | S8  |
| 3 | Quantum chemical calculations..... | S11 |

## 1. NMR spectra

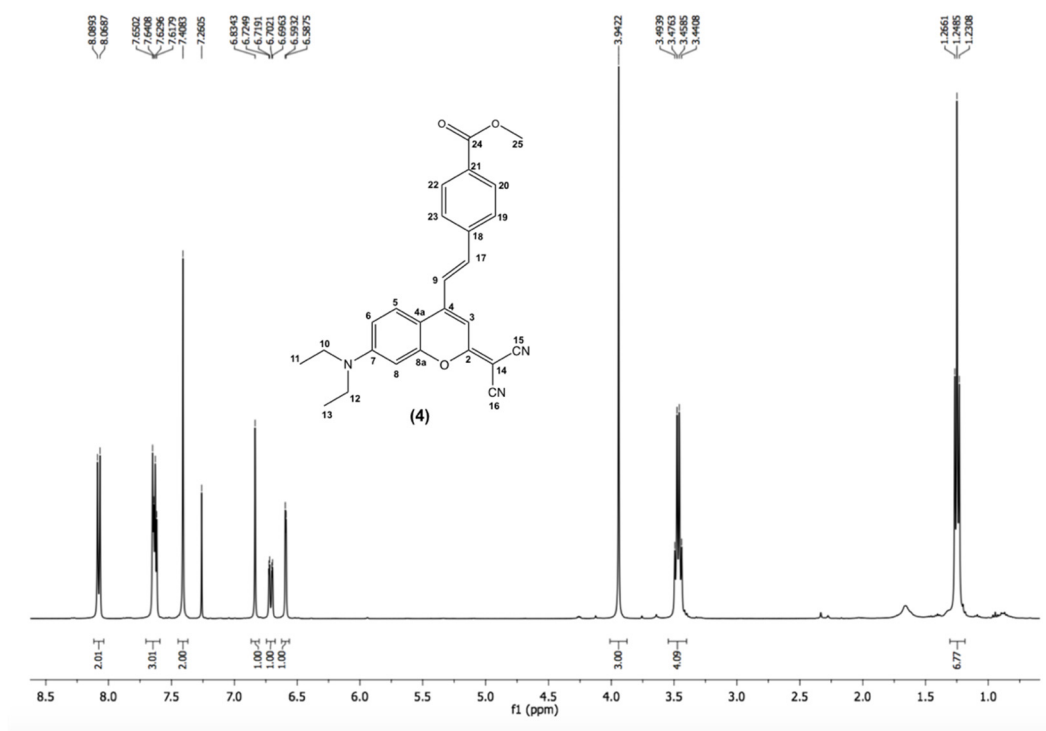

<sup>1</sup>H-NMR spectrum of **4** (CDCl<sub>3</sub>, 400 MHz)

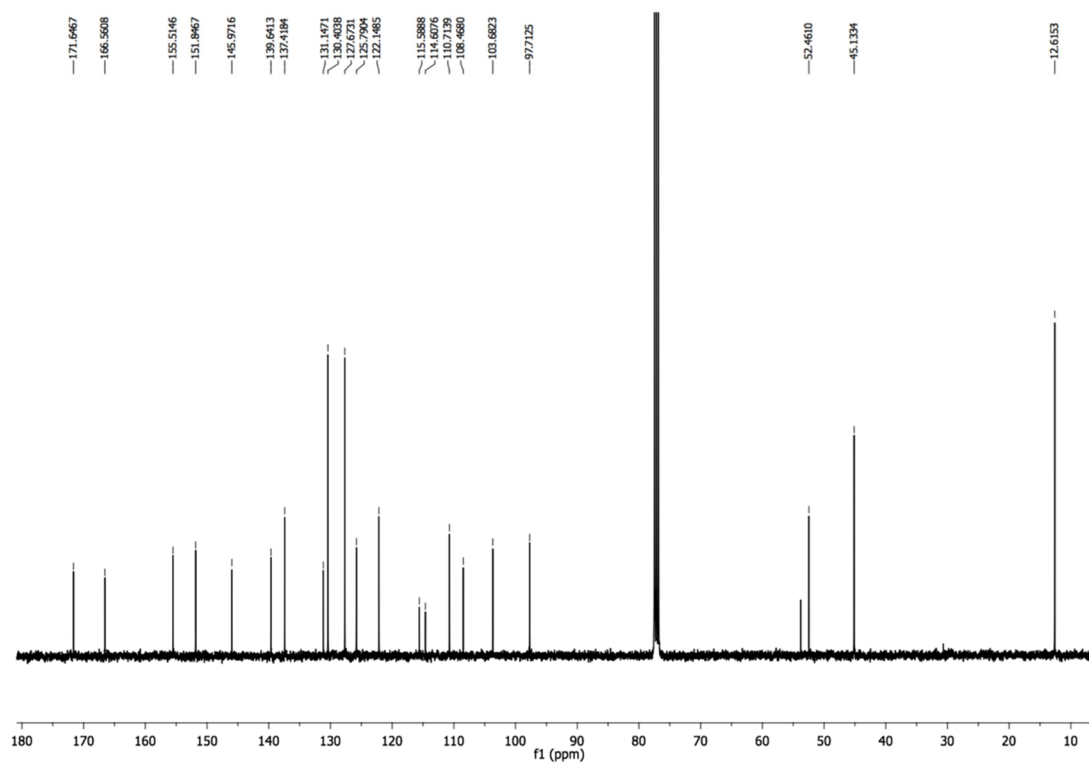

<sup>13</sup>C-NMR spectrum of **4** (CDCl<sub>3</sub>, 100 MHz)

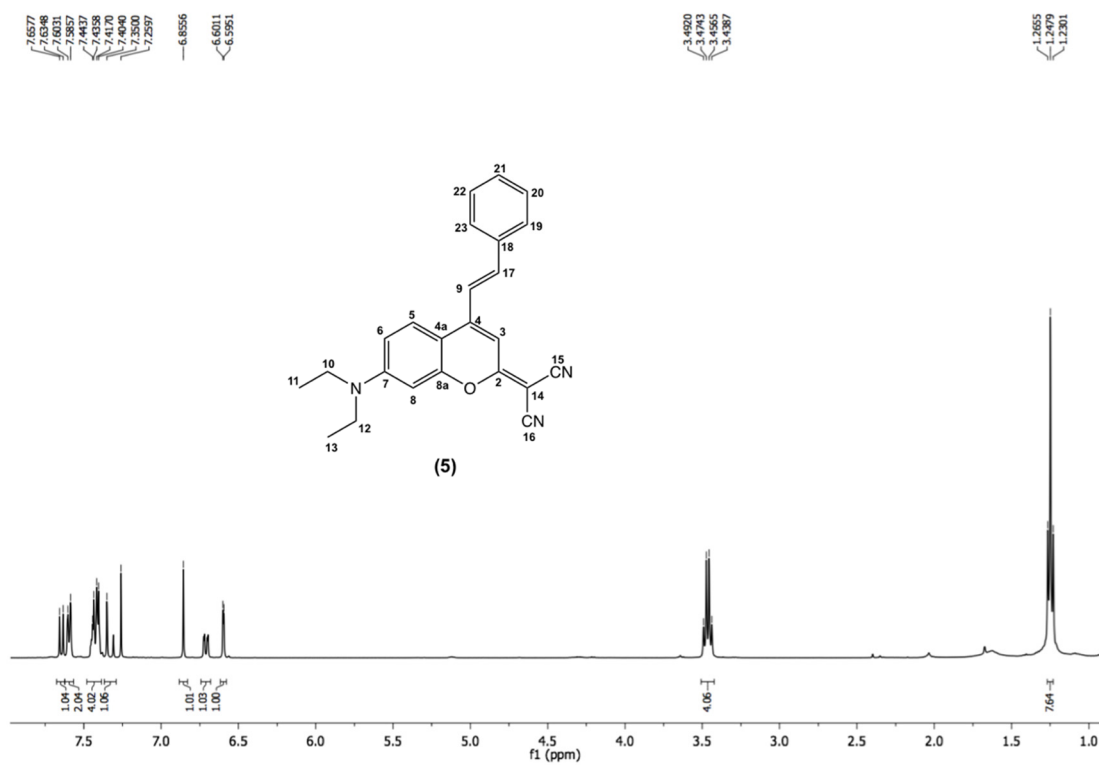

$^1\text{H}$ -NMR spectrum of **5** ( $\text{CDCl}_3$ , 400 MHz)

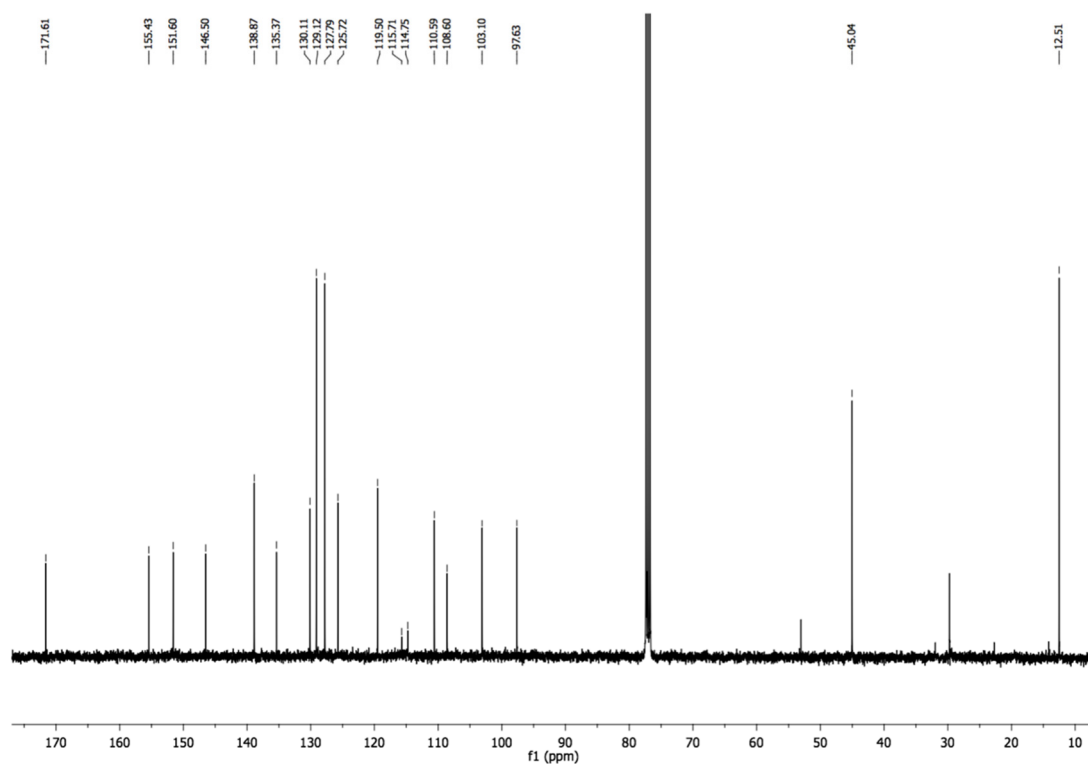

$^{13}\text{C}$ -NMR spectrum of **5** ( $\text{CDCl}_3$ , 100 MHz)

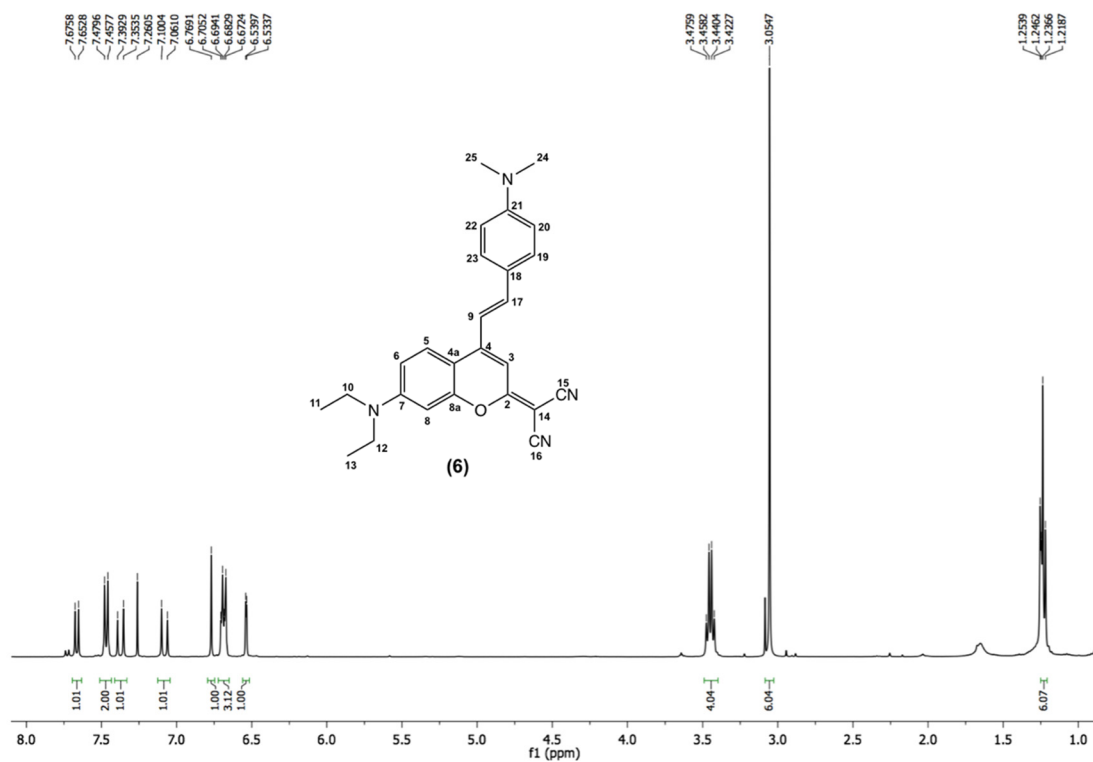

*<sup>1</sup>H-NMR spectrum of 6 (CDCl<sub>3</sub>, 400 MHz)*

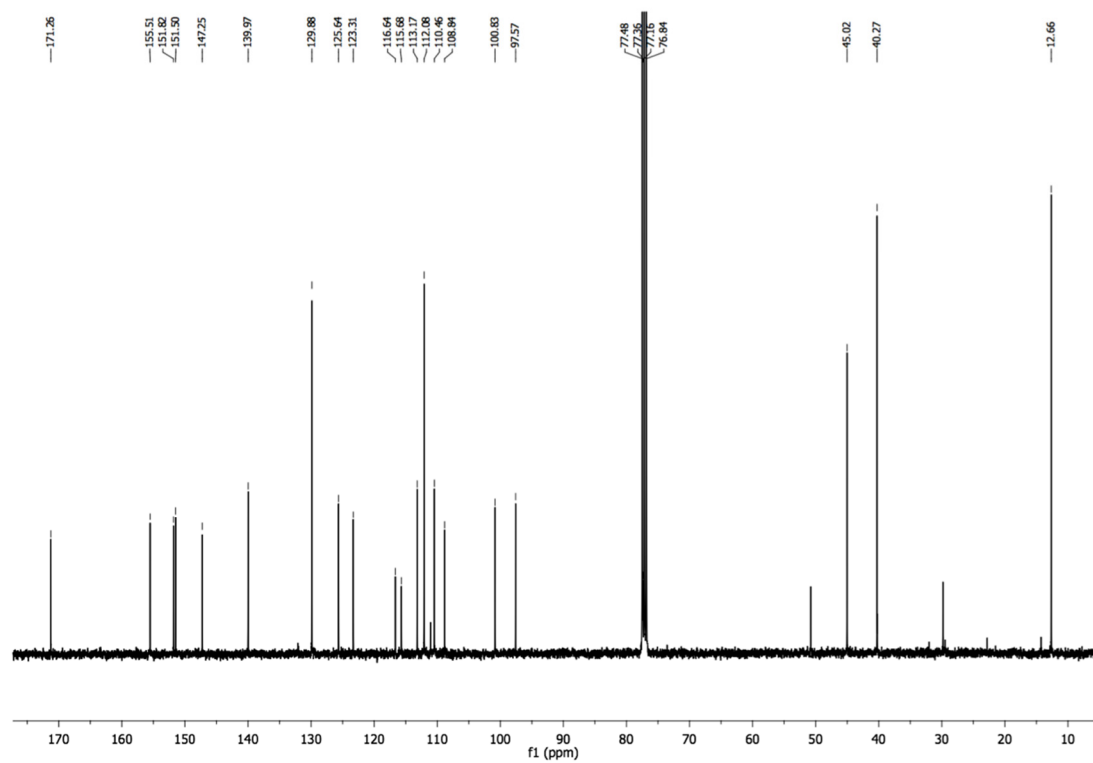

*<sup>13</sup>C-NMR spectrum of 6 (CDCl<sub>3</sub>, 100 MHz)*

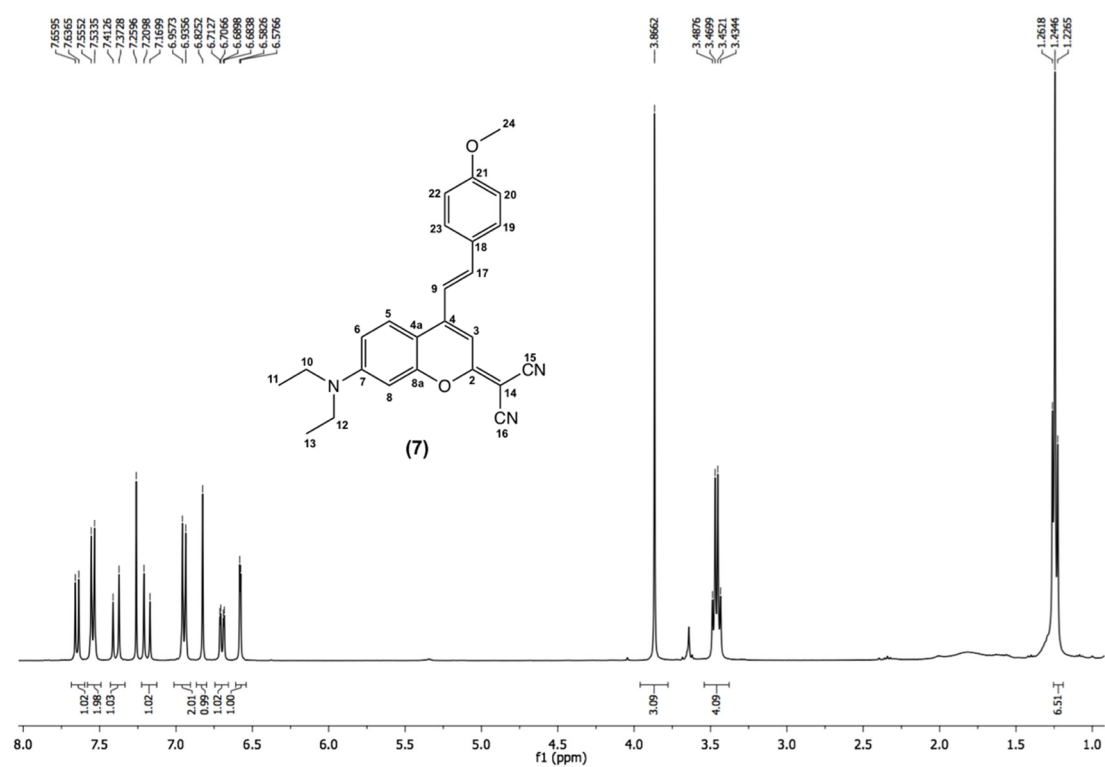

*<sup>1</sup>H-NMR spectrum of 7 (CDCl<sub>3</sub>, 400 MHz)*

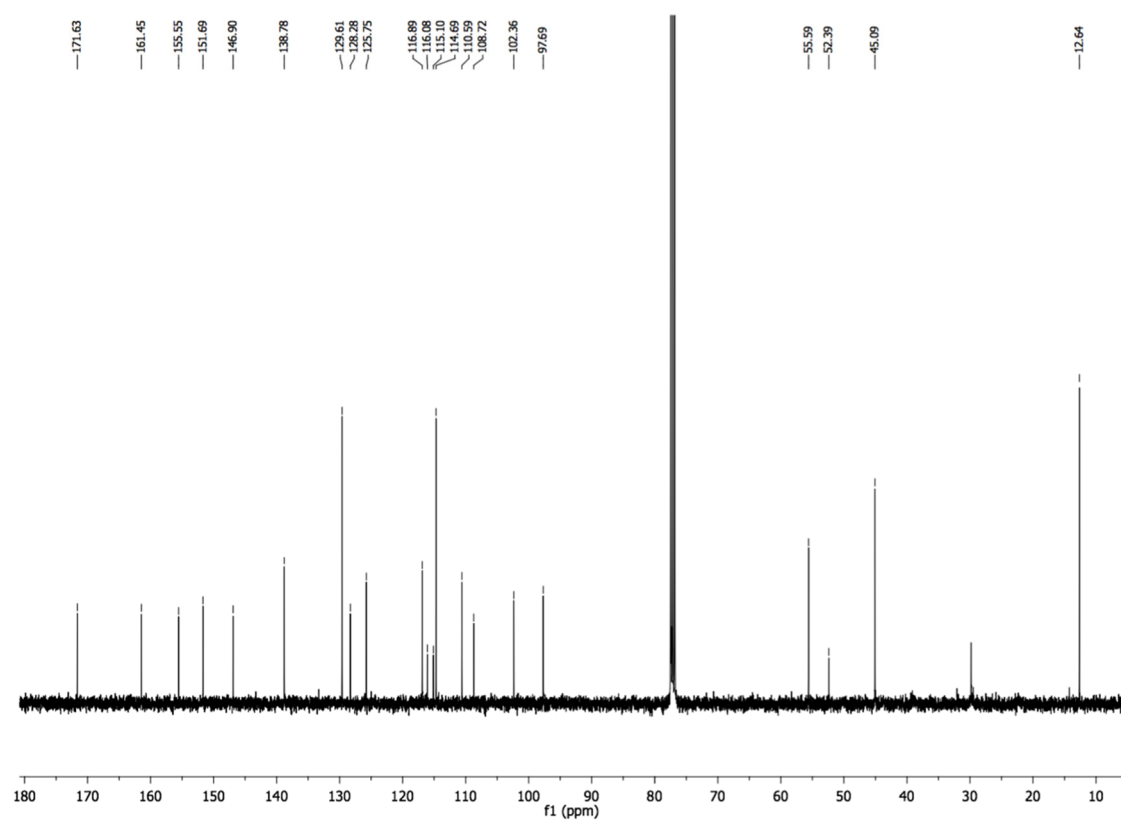

*<sup>13</sup>C-NMR spectrum of 7 (CDCl<sub>3</sub>, 100 MHz)*

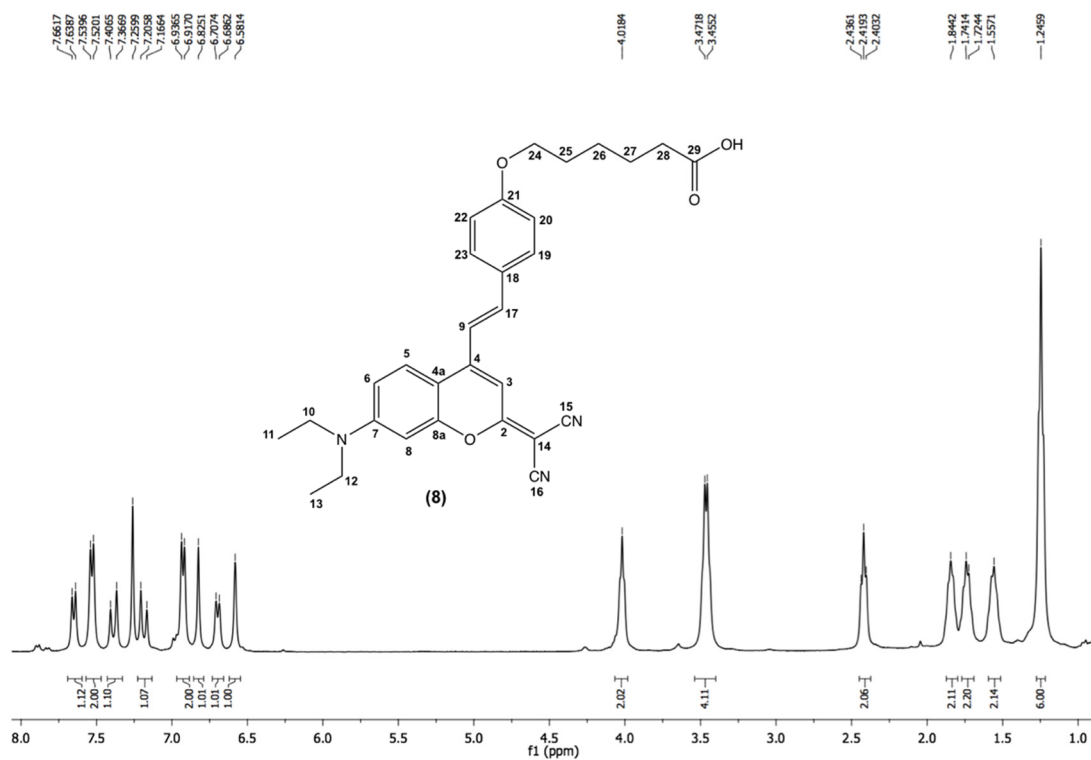

<sup>1</sup>H-NMR spectrum of **8** (CDCl<sub>3</sub>, 400 MHz)

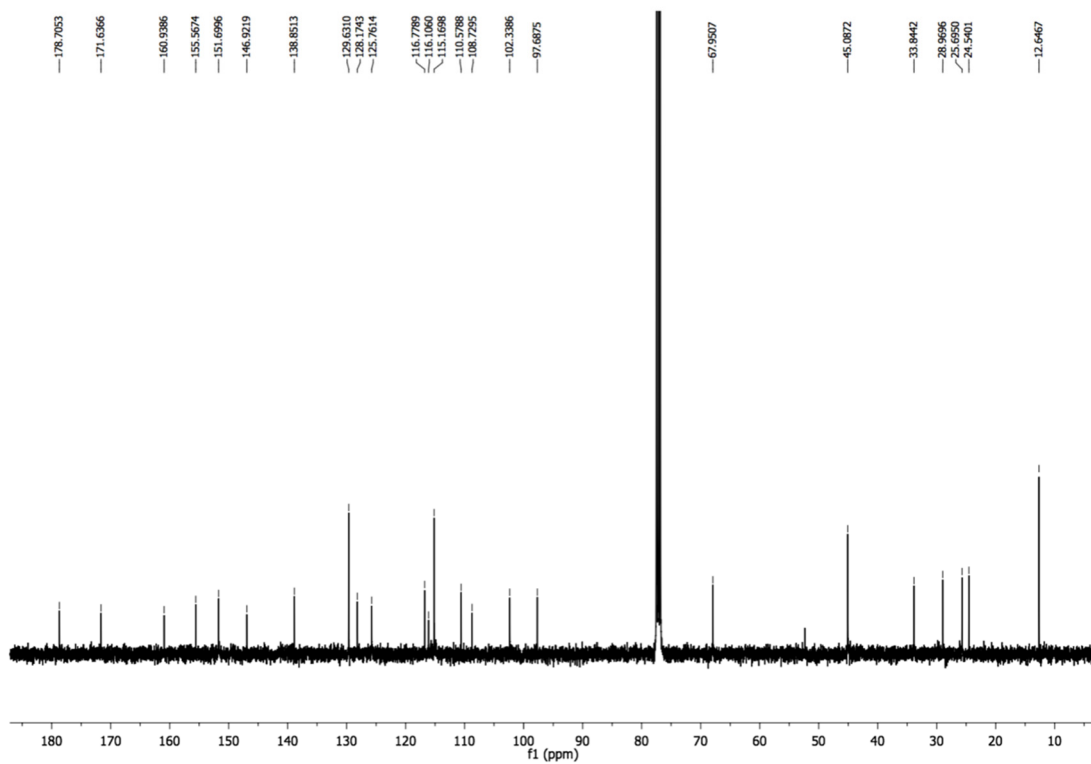

<sup>13</sup>C-NMR spectrum of **8** (CDCl<sub>3</sub>, 100 MHz)

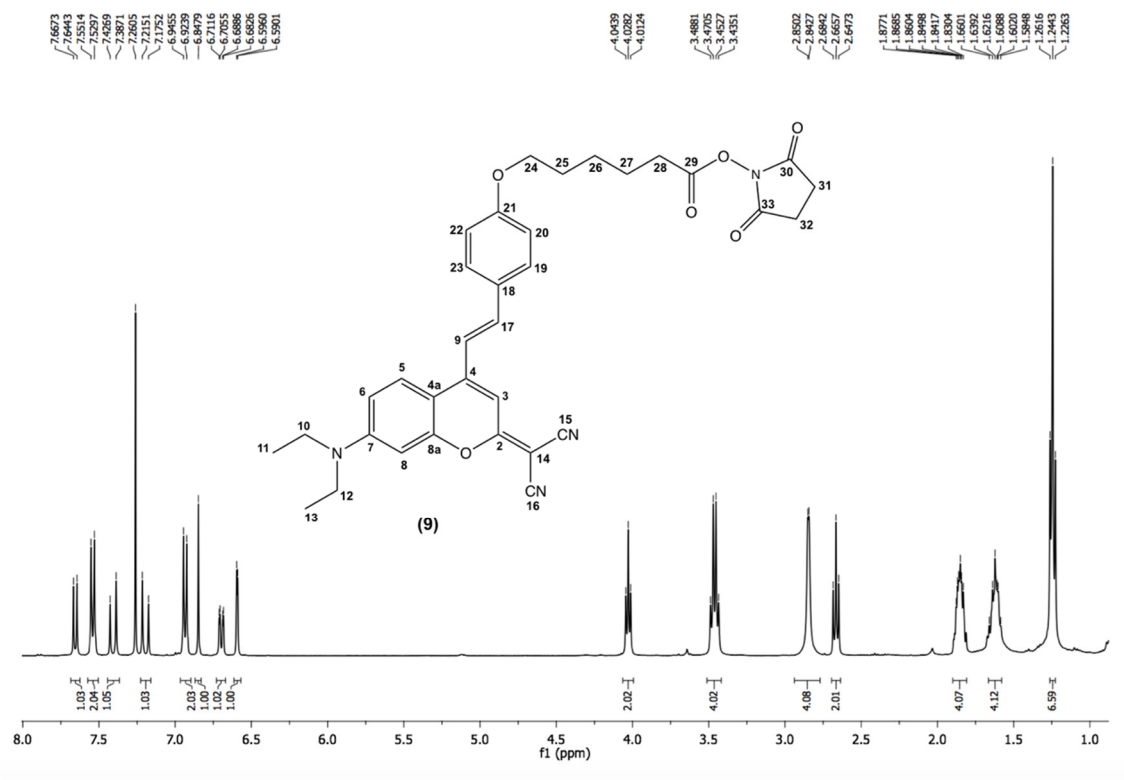

<sup>1</sup>H-NMR spectrum of 9 (CDCl<sub>3</sub>, 400 MHz)

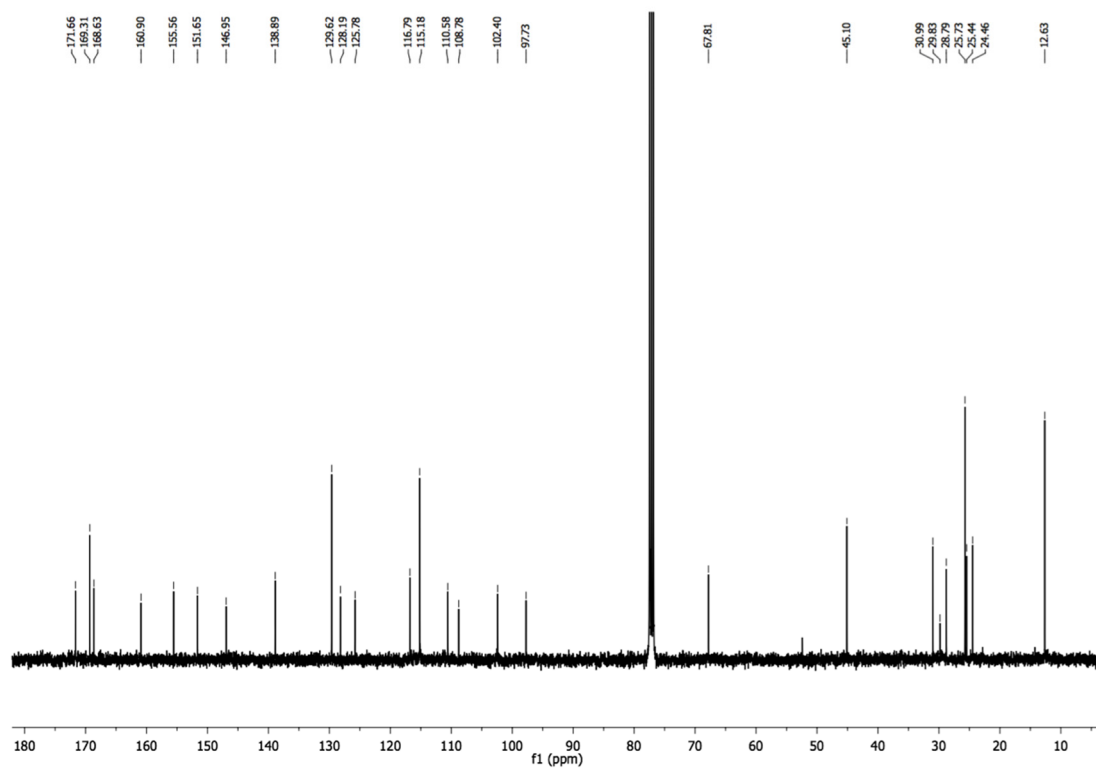

<sup>13</sup>C-NMR spectrum of 9 (CDCl<sub>3</sub>, 100 MHz)

## 2. Mass spectra

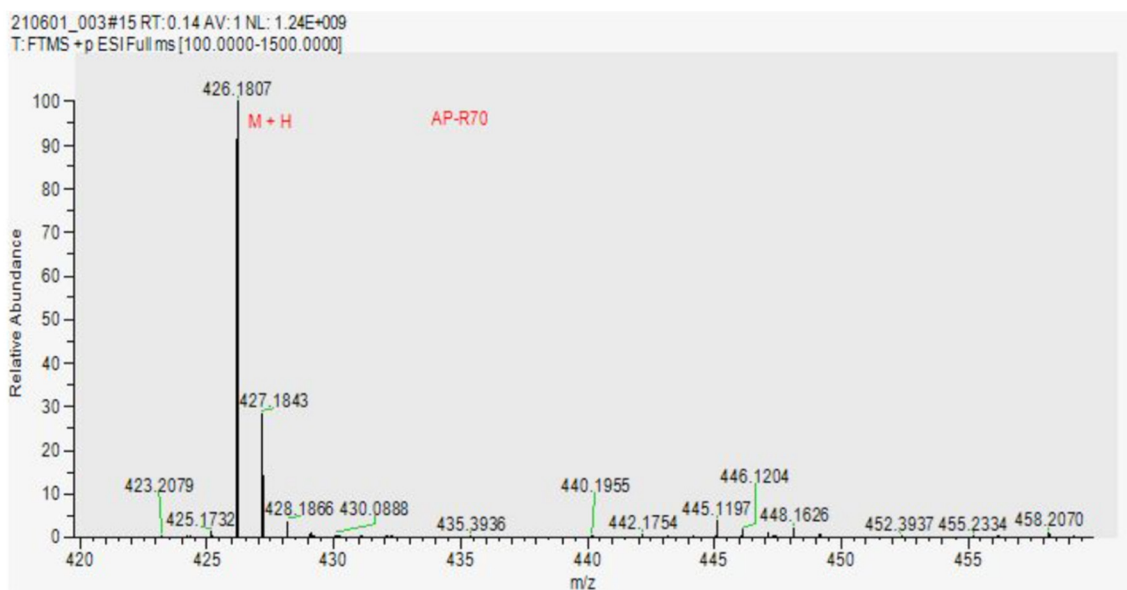

Mass spectrum of 4

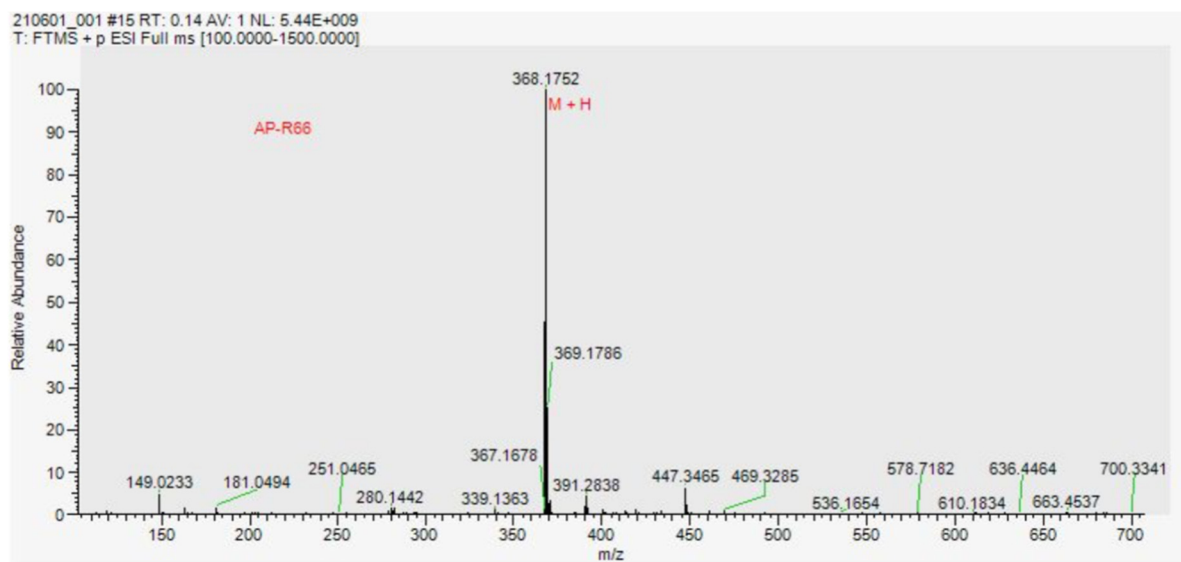

Mass spectrum of 5



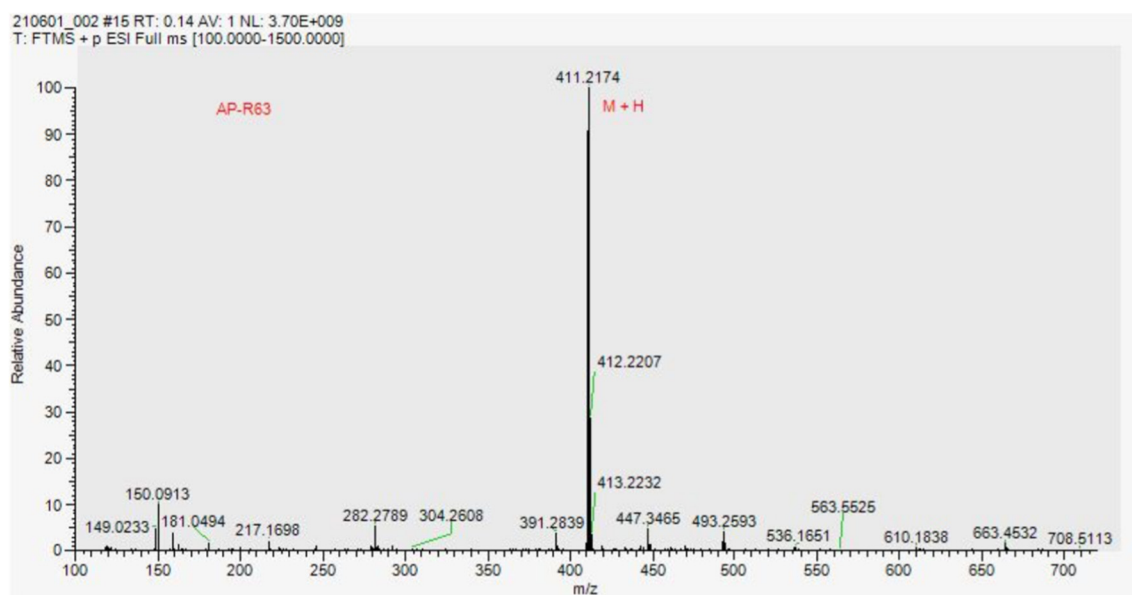

Mass spectrum of 6

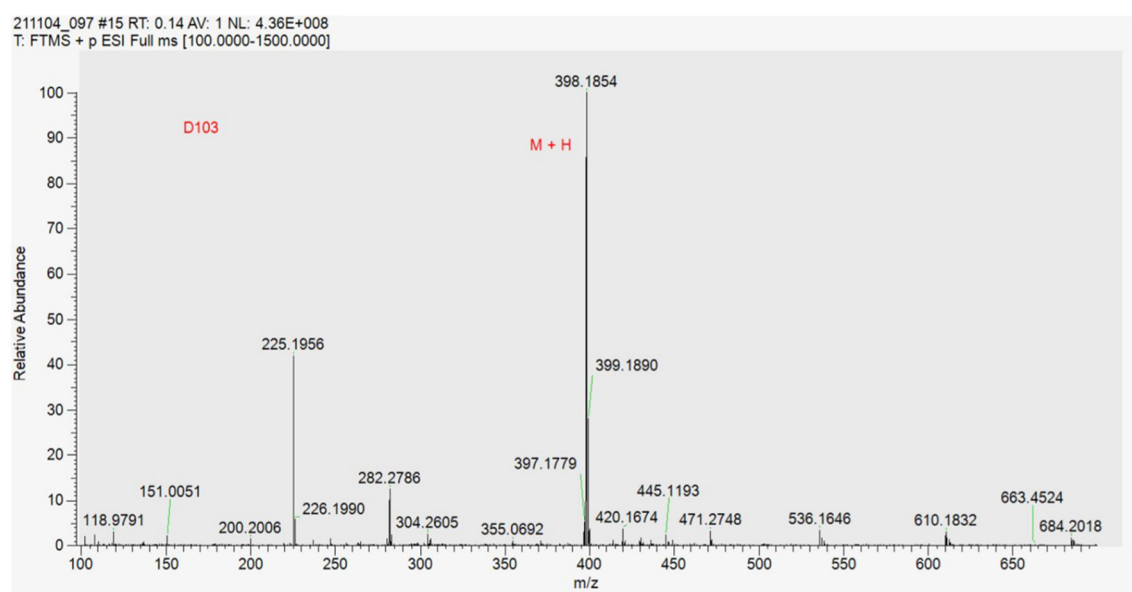

Mass spectrum of 7

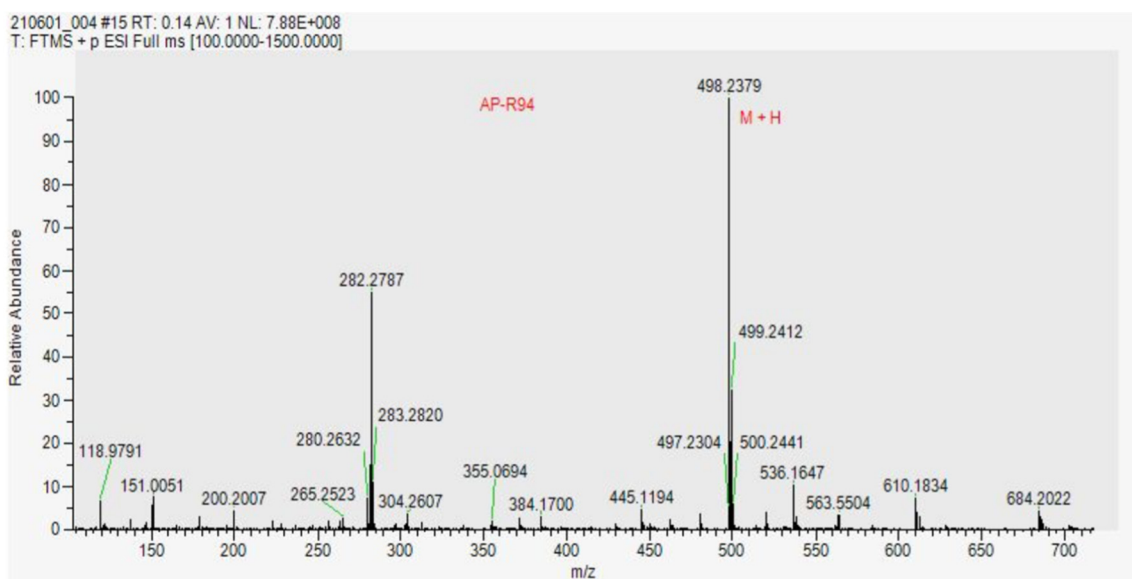

Mass spectrum of **8**

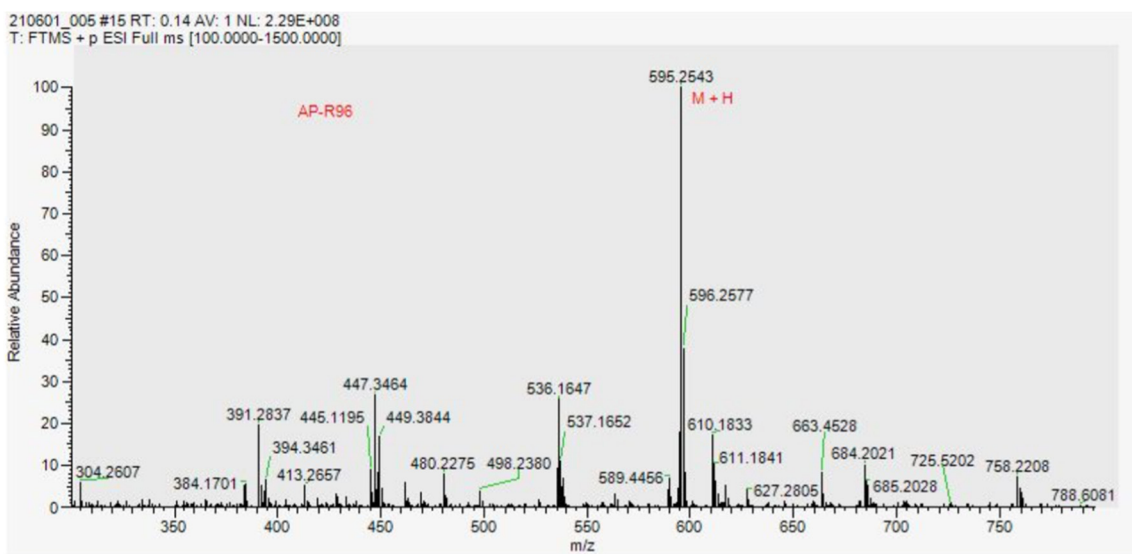

Mass spectrum of **9**

### 3. Quantum chemical calculations

Quantum calculations were performed with the Gaussian 16 software package [44]. The hybrid PBE0 functional [45] with the standard 6-31G(d,p) basis set was used for geometry optimizations, both in the ground state and in the first singlet excited state, while the larger 6-311+G(d,p) basis set was employed for the spectra calculations. The PBE0 functional, besides being widely used for calculating ground state geometries, proved also to be very effective for TD-DFT calculation of excited-state structures [46]. In all cases solvent effects were taken into account by means of the implicit polarized continuum model (PCM) [47,48]. No symmetry constraints are used during geometry optimizations. The frequency analysis confirmed the optimized structures as minima presenting all real valued frequencies.

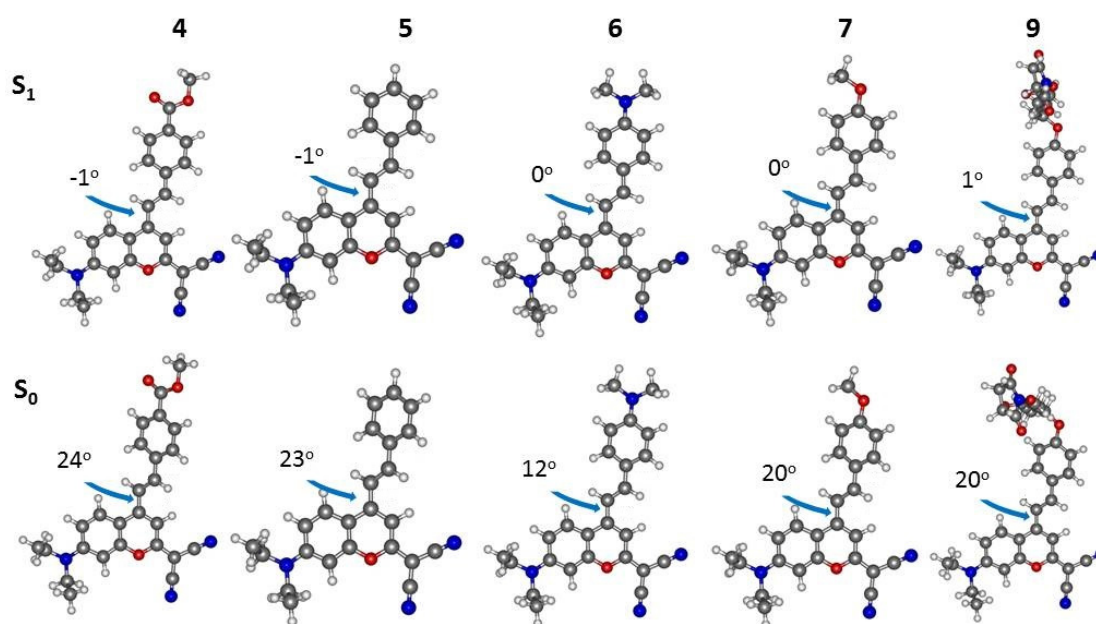

**Figure S1.** Optimized structures of the compounds in the ground state  $S_0$  and in the first excited state  $S_1$ .

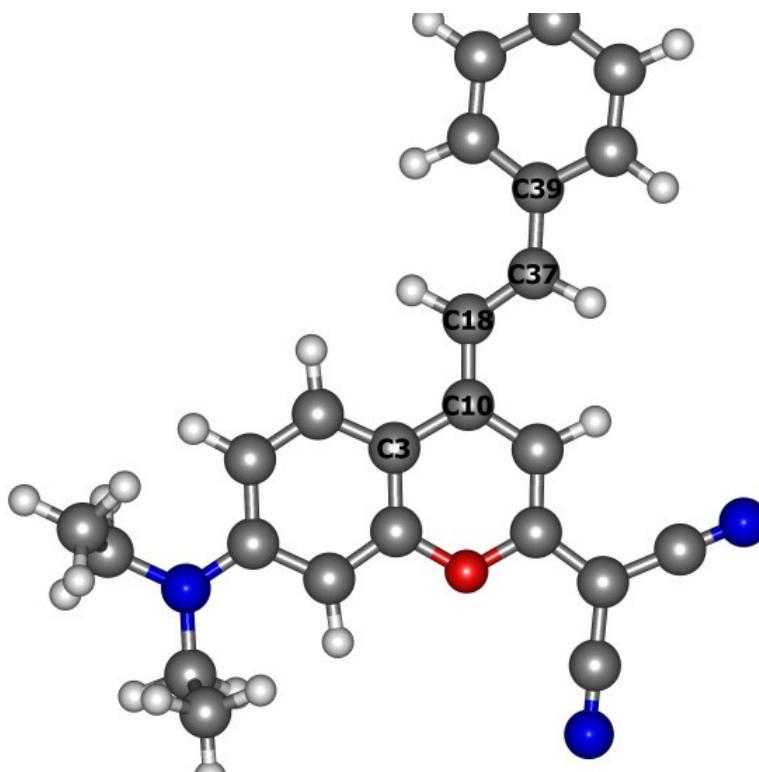

**Figure S2.** Numbering scheme adopted, common to all compounds.

**Table S1.** Selected bond distances (Å) and dihedral angle (°) of the compounds in the ground  $S_0$  and excited  $S_1$  states.

|       | r[C10-C18] | r[C18-C37] | r[C37-C39] | BLA  | D <sub>h</sub> [C3-C10-C18-C37] |
|-------|------------|------------|------------|------|---------------------------------|
| $S_0$ |            |            |            |      |                                 |
| 4     | 1.456      | 1.348      | 1.459      | 0.11 | 24.5                            |
| 5     | 1.454      | 1.349      | 1.458      | 0.11 | 23.0                            |
| 6     | 1.442      | 1.359      | 1.440      | 0.08 | 11.9                            |
| 7     | 1.450      | 1.353      | 1.451      | 0.10 | 19.8                            |
| 9     | 1.450      | 1.353      | 1.451      | 0.10 | 19.6                            |
| $S_1$ |            |            |            |      |                                 |
| 4     | 1.409      | 1.382      | 1.432      | 0.04 | -0.9                            |
| 5     | 1.409      | 1.380      | 1.440      | 0.04 | -0.6                            |
| 6     | 1.417      | 1.385      | 1.430      | 0.04 | -0.3                            |
| 7     | 1.406      | 1.383      | 1.436      | 0.04 | -0.5                            |
| 9     | 1.405      | 1.383      | 1.436      | 0.04 | 0.7                             |

**Table S2.** Calculated absorption data for the compounds and the main orbitals involved in the transitions

**Compound 4**

| State           | $\lambda$ (nm) | $f$   | Major MO $\rightarrow$ MO transitions                                                      |
|-----------------|----------------|-------|--------------------------------------------------------------------------------------------|
| S <sub>1</sub>  | 534.7          | 0.542 | HOMO- $\rightarrow$ LUMO (99%)                                                             |
| S <sub>2</sub>  | 417.4          | 1.203 | H-1- $\rightarrow$ LUMO (98%)                                                              |
| S <sub>3</sub>  | 355.4          | 0.302 | H-2- $\rightarrow$ LUMO (95%)                                                              |
| S <sub>4</sub>  | 344.8          | 0.314 | HOMO- $\rightarrow$ L+1 (97%)                                                              |
| S <sub>5</sub>  | 303.9          | 0.037 | H-3- $\rightarrow$ LUMO (93%)                                                              |
| S <sub>6</sub>  | 300.1          | 0.065 | H-4- $\rightarrow$ LUMO (71%), HOMO- $\rightarrow$ L+2 (21%)                               |
| S <sub>7</sub>  | 289.6          | 0.231 | H-1- $\rightarrow$ L+1 (41%), HOMO- $\rightarrow$ L+2 (42%)                                |
| S <sub>8</sub>  | 280.3          | 0.028 | H-4- $\rightarrow$ LUMO (17%), H-1- $\rightarrow$ L+1 (53%), HOMO- $\rightarrow$ L+2 (22%) |
| S <sub>9</sub>  | 270.7          | 0.001 | H-1- $\rightarrow$ L+5 (17%), HOMO- $\rightarrow$ L+5 (77%)                                |
| S <sub>10</sub> | 270.6          | 0.000 | H-5- $\rightarrow$ LUMO (78%), H-5- $\rightarrow$ L+1 (17%)                                |

**Compound 5**

| State           | $\lambda$ (nm) | $f$   | Major MO $\rightarrow$ MO transitions                                                      |
|-----------------|----------------|-------|--------------------------------------------------------------------------------------------|
| S <sub>1</sub>  | 513.3          | 0.618 | HOMO- $\rightarrow$ LUMO (99%)                                                             |
| S <sub>2</sub>  | 415.0          | 1.140 | H-1- $\rightarrow$ LUMO (98%)                                                              |
| S <sub>3</sub>  | 349.3          | 0.164 | H-2- $\rightarrow$ LUMO (96%)                                                              |
| S <sub>4</sub>  | 316.2          | 0.244 | HOMO- $\rightarrow$ L+1 (94%)                                                              |
| S <sub>5</sub>  | 304.1          | 0.023 | H-3- $\rightarrow$ LUMO (95%)                                                              |
| S <sub>6</sub>  | 292.8          | 0.062 | H-4- $\rightarrow$ LUMO (76%), HOMO- $\rightarrow$ L+2 (17%)                               |
| S <sub>7</sub>  | 278.8          | 0.347 | H-4- $\rightarrow$ LUMO (14%), H-1- $\rightarrow$ L+1 (15%), HOMO- $\rightarrow$ L+2 (61%) |
| S <sub>8</sub>  | 271.8          | 0.002 | H-1- $\rightarrow$ L+5 (15%), HOMO- $\rightarrow$ L+5 (76%)                                |
| S <sub>9</sub>  | 267.3          | 0.045 | H-1- $\rightarrow$ L+1 (65%), HOMO- $\rightarrow$ L+2 (15%)                                |
| S <sub>10</sub> | 262.2          | 0.083 | H-1- $\rightarrow$ L+1 (16%), HOMO- $\rightarrow$ L+3 (10%), HOMO- $\rightarrow$ L+4 (64%) |

**Compound 6**

| State           | $\lambda$ (nm) | $f$   | Major MO $\rightarrow$ MO transitions                                                       |
|-----------------|----------------|-------|---------------------------------------------------------------------------------------------|
| S <sub>1</sub>  | 543.9          | 1.442 | HOMO- $\rightarrow$ LUMO (98%)                                                              |
| S <sub>2</sub>  | 495.6          | 0.712 | H-1- $\rightarrow$ LUMO (99%)                                                               |
| S <sub>3</sub>  | 360.1          | 0.017 | H-2- $\rightarrow$ LUMO (95%)                                                               |
| S <sub>4</sub>  | 317.1          | 0.130 | H-3- $\rightarrow$ LUMO (24%), HOMO- $\rightarrow$ L+1 (65%)                                |
| S <sub>5</sub>  | 310.8          | 0.054 | H-3- $\rightarrow$ LUMO (39%), H-1- $\rightarrow$ L+1 (25%), HOMO- $\rightarrow$ L+1 (23%)  |
| S <sub>6</sub>  | 306.1          | 0.242 | H-3- $\rightarrow$ LUMO (31%), H-1- $\rightarrow$ L+1 (63%)                                 |
| S <sub>7</sub>  | 299.1          | 0.022 | H-4- $\rightarrow$ LUMO (65%), HOMO- $\rightarrow$ L+3 (20%)                                |
| S <sub>8</sub>  | 284.6          | 0.106 | H-4- $\rightarrow$ LUMO (26%), HOMO- $\rightarrow$ L+2 (40%), HOMO- $\rightarrow$ L+3 (29%) |
| S <sub>9</sub>  | 280.6          | 0.272 | H-1- $\rightarrow$ L+2 (13%), HOMO- $\rightarrow$ L+2 (42%), HOMO- $\rightarrow$ L+3 (31%)  |
| S <sub>10</sub> | 278.7          | 0.003 | H-2- $\rightarrow$ L+5 (13%), H-1- $\rightarrow$ L+5 (42%), HOMO- $\rightarrow$ L+5 (38%)   |

**Compound 7**

| State           | $\lambda$ (nm) | $f$   | Major MO $\rightarrow$ MO transitions                                                      |
|-----------------|----------------|-------|--------------------------------------------------------------------------------------------|
| S <sub>1</sub>  | 507.2          | 0.634 | HOMO- $\rightarrow$ LUMO (99%)                                                             |
| S <sub>2</sub>  | 452.3          | 1.324 | H-1- $\rightarrow$ LUMO (99%)                                                              |
| S <sub>3</sub>  | 354.3          | 0.034 | H-2- $\rightarrow$ LUMO (96%)                                                              |
| S <sub>4</sub>  | 312.7          | 0.209 | HOMO- $\rightarrow$ L+1 (88%)                                                              |
| S <sub>5</sub>  | 297.9          | 0.049 | H-3- $\rightarrow$ LUMO (83%)                                                              |
| S <sub>6</sub>  | 293.6          | 0.031 | H-4- $\rightarrow$ LUMO (78%)                                                              |
| S <sub>7</sub>  | 283.6          | 0.212 | H-4- $\rightarrow$ LUMO (10%), H-1- $\rightarrow$ L+1 (70%), HOMO- $\rightarrow$ L+2 (15%) |
| S <sub>8</sub>  | 275.0          | 0.179 | H-1- $\rightarrow$ L+1 (17%), HOMO- $\rightarrow$ L+2 (66%)                                |
| S <sub>9</sub>  | 273.6          | 0.005 | H-2- $\rightarrow$ L+5 (11%), HOMO- $\rightarrow$ L+5 (75%)                                |
| S <sub>10</sub> | 263.5          | 0.078 | H-1- $\rightarrow$ L+2 (13%), HOMO- $\rightarrow$ L+3 (31%), HOMO- $\rightarrow$ L+4 (43%) |

**Compound 9**

| State           | $\lambda$ (nm) | $f$   | Major MO $\rightarrow$ MO transitions                       |
|-----------------|----------------|-------|-------------------------------------------------------------|
| S <sub>1</sub>  | 506.8          | 0.639 | HOMO- $\rightarrow$ LUMO (99%)                              |
| S <sub>2</sub>  | 455.2          | 1.346 | H-1- $\rightarrow$ LUMO (99%)                               |
| S <sub>3</sub>  | 354.5          | 0.031 | H-2- $\rightarrow$ LUMO (96%)                               |
| S <sub>4</sub>  | 312.5          | 0.206 | HOMO- $\rightarrow$ L+1 (88%)                               |
| S <sub>5</sub>  | 298.1          | 0.052 | H-3- $\rightarrow$ LUMO (80%)                               |
| S <sub>6</sub>  | 294.4          | 0.026 | H-4- $\rightarrow$ LUMO (77%)                               |
| S <sub>7</sub>  | 284.5          | 0.208 | H-1- $\rightarrow$ L+1 (73%), HOMO- $\rightarrow$ L+3 (12%) |
| S <sub>8</sub>  | 275.1          | 0.198 | H-1- $\rightarrow$ L+1 (14%), HOMO- $\rightarrow$ L+3 (68%) |
| S <sub>9</sub>  | 273.8          | 0.005 | H-2- $\rightarrow$ L+7 (11%), HOMO- $\rightarrow$ L+7 (76%) |
| S <sub>10</sub> | 266.7          | 0.000 | HOMO- $\rightarrow$ L+2 (100%)                              |

**Table S3.** Calculated emission data for the studied compounds and the main orbitals involved in the S<sub>1</sub> $\rightarrow$ S<sub>0</sub> transitions.

| Compound | $\lambda$ (nm) | $f$   | Major MO $\rightarrow$ MO transitions |
|----------|----------------|-------|---------------------------------------|
| 4        | 630.2          | 0.438 | HOMO- $\rightarrow$ LUMO (99%)        |
| 5        | 590.0          | 0.505 | HOMO- $\rightarrow$ LUMO (99%)        |
| 6        | 583.0          | 1.512 | HOMO- $\rightarrow$ LUMO (99%)        |
| 7        | 577.1          | 0.539 | HOMO- $\rightarrow$ LUMO (99%)        |
| 9        | 576.2          | 0.546 | HOMO- $\rightarrow$ LUMO (99%)        |
